# Supplementary material for: Interleukin-1 Receptor Antagonist Protects Newborn Mice Against Pulmonary Hypertension
Source: PubMed Central journal article supplement (PMC6637286; doi:10.3389/fimmu.2019.01480), 2019-07-11
Supplement: Image_1.pdf [file Image_1.pdf]

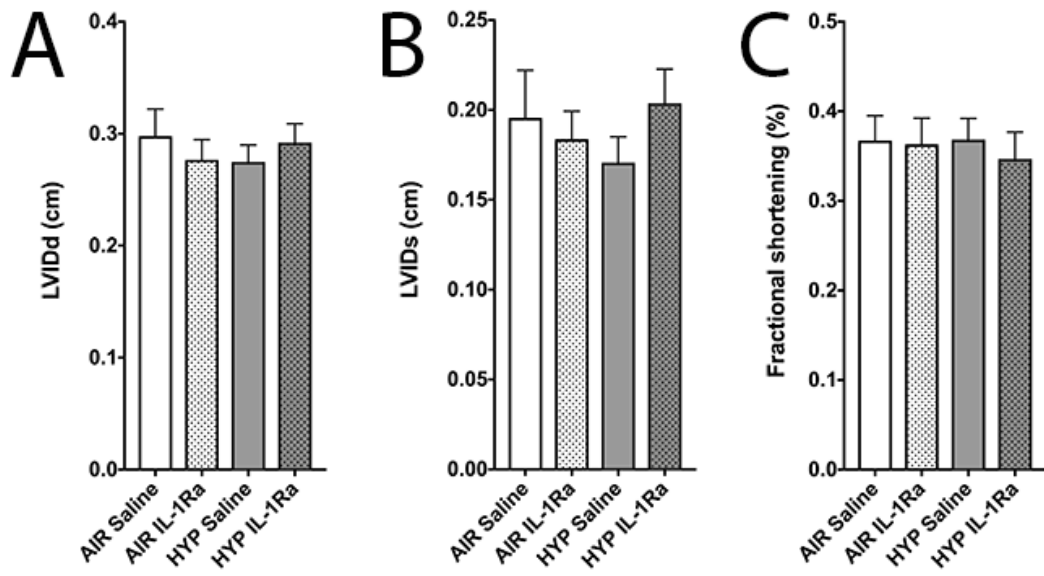

**Supplementary Figure 1.**

Echocardiography was performed on 28d mice after exposure to LPS and 65% O<sub>2</sub> to assess LV function. Measurements included left ventricular internal diameter at end-diastole (LVIDd; A) and end-systole (LVIDs; B) and fractional shortening (C).
