# Supplementary material for: Interleukin-1 Receptor Antagonist Protects Newborn Mice Against Pulmonary Hypertension
Source: PubMed Central journal article supplement (PMC6637286; doi:10.3389/fimmu.2019.01480), 2019-07-11
Supplement: Image_2.pdf [file Image_2.pdf]

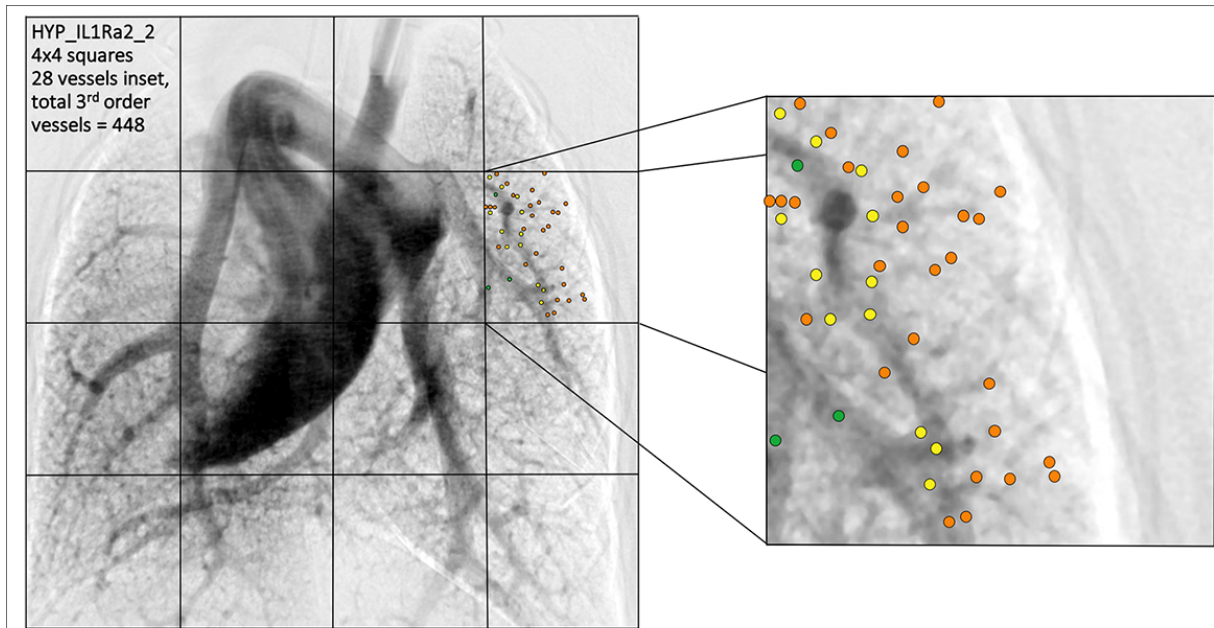

**Supplementary Figure 2.**

Cine-angiography was performed on 60d mice treated with IL-1Ra for the first 28d of life. Each vessel was manually marked with a color-coded dot (green-1<sup>st</sup>, yellow-2<sup>nd</sup> and orange 3<sup>rd</sup>) and all dots were counted automatically with ImageJ software (Schneider et al., 2012). Representative hyperoxia IL-1Ra-treated mouse shows estimated number of 3<sup>rd</sup> generation branches in middle right lobe and all lobes (dots not shown for clarity).
